# Supplementary material for: Twin epidemics: the effects of HIV and systolic blood pressure on mortality risk in rural South Africa, 2010-2019
Source: Springer Nature journal article supplement (doi:10.1186/s12889-022-12791-z), 2022-02-24
Supplement: MOESM1 [file 20165916]

**Additional File 1.** Multivariable logistic regression of all-cause mortality on HIV status, diastolic blood pressure and baseline characteristics, Agincourt, South Africa, 2010-2019.

| Covariates                                             | Men   |                |         | Women |                |         |
|--------------------------------------------------------|-------|----------------|---------|-------|----------------|---------|
|                                                        | aOR   | 95% CI         | P-value | aOR   | 95% CI         | P-value |
| Age                                                    | 1.049 | (1.037, 1.062) | <0.001  | 1.060 | (1.046, 1.074) | <0.001  |
| HIV Status [ref: HIV negative]                         |       |                |         |       |                |         |
| HIV Positive Suppressed <sup>a</sup>                   | 1.564 | (0.934, 2.619) | 0.089   | 1.256 | (0.710, 2.222) | 0.434   |
| HIV Positive, Unsuppressed <sup>b</sup>                | 3.237 | (2.217, 4.726) | <0.001  | 1.966 | (1.217, 3.175) | 0.006   |
| Diastolic Blood Pressure                               | 0.918 | (0.877, 0.961) | <0.001  | 0.926 | (0.861, 0.995) | 0.037   |
| Diastolic Blood Pressure Squared <sup>c</sup>          | 1.000 | (1.000, 1.000) | <0.001  | 1.000 | (1.000, 1.000) | 0.023   |
| Blood Pressure Medication                              | 1.618 | (1.123, 2.330) | 0.010   | 1.300 | (0.953, 1.773) | 0.098   |
| Marital Status [ref: single]                           |       |                |         |       |                |         |
| Married/cohabiting                                     | 0.483 | (0.321, 0.726) | <0.001  | 0.602 | (0.342, 1.058) | 0.078   |
| Widowed/divorced                                       | 0.710 | (0.444, 1.137) | 0.154   | 0.927 | (0.554, 1.551) | 0.773   |
| Education Level [ref: none/very low ( $\leq 3$ years)] |       |                |         |       |                |         |
| Primary (4-8 years)                                    | 0.670 | (0.470, 0.954) | 0.026   | 0.937 | (0.617, 1.424) | 0.761   |
| Secondary school or higher ( $> 8$ years)              | 0.454 | (0.261, 0.792) | 0.005   | 0.845 | (0.472, 1.515) | 0.572   |
| N                                                      |       | 1,000          |         |       | 1,697          |         |
| Person Years                                           |       | 7,388          |         |       | 13,193         |         |

<sup>a</sup> <400 copies/mL.

<sup>b</sup>  $\geq 400$  copies/mL.

<sup>c</sup> Coefficients and 95% CI are small numbers which appear as 1.000 due to rounding.
