# Supplementary material for: Twin epidemics: the effects of HIV and systolic blood pressure on mortality risk in rural South Africa, 2010-2019
Source: Springer Nature journal article supplement (doi:10.1186/s12889-022-12791-z), 2022-02-24
Supplement: MOESM2 [file 20165916]

**Additional File 2.** Multivariable logistic regression of all-cause mortality for men on baseline characteristics: no covariates, all covariates, and alternate viral load threshold on all-cause mortality, Agincourt, South Africa, 2010-2019.

| Covariates                                        | No Covariates |                |         | All Covariates |                |         | Alt. VL Threshold |                |         |
|---------------------------------------------------|---------------|----------------|---------|----------------|----------------|---------|-------------------|----------------|---------|
|                                                   | aOR           | 95% CI         | P-value | aOR            | 95% CI         | P-value | aOR               | 95% CI         | P-value |
| Age                                               | 1.050         | (1.047, 1.067) | <0.001  | 1.049          | (1.035, 1.063) | <0.001  | 1.050             | (1.038, 1.062) | <0.001  |
| HIV Status 1 [ref: HIV negative]                  |               |                |         |                |                |         |                   |                |         |
| HIV Positive Suppressed <sup>a</sup>              | 1.840         | (1.114, 3.040) | 0.017   | 1.498          | (0.880, 2.550) | 0.137   |                   |                |         |
| HIV Positive, Unsuppressed <sup>b</sup>           | 3.437         | (2.363, 4.998) | <0.001  | 3.406          | (2.302, 5.040) | <0.001  |                   |                |         |
| HIV Status 2 [ref: HIV negative]                  |               |                |         |                |                |         |                   |                |         |
| HIV Positive Suppressed <sup>c</sup>              |               |                |         |                |                |         | 1.595             | (0.988, 2.575) | 0.056   |
| HIV Positive, Unsuppressed <sup>d</sup>           |               |                |         |                |                |         | 3.456             | (2.345, 5.084) | <0.001  |
| Systolic Blood Pressure                           | 0.934         | (0.852, 0.974) | 0.002   | 0.932          | (0.893, 0.972) | <0.001  | 0.930             | (0.892, 0.970) | <0.001  |
| Systolic Blood Pressure <sup>e</sup>              | 1.000         | (1.000, 1.000) | 0.002   | 1.000          | (1.000, 1.000) | 0.002   | 1.000             | (1.000, 1.000) | <0.001  |
| Blood Pressure Medication                         | 1.389         | (0.962, 2.005) | 0.079   | 1.346          | (0.921, 1.969) | 0.125   | 1.517             | (1.044, 2.204) | 0.029   |
| Marital Status [ref: single]                      |               |                |         |                |                |         |                   |                |         |
| Married/cohabiting                                |               |                |         | 0.500          | (0.323, 0.774) | 0.002   | 0.490             | (0.326, 0.737) | <0.001  |
| Widowed/divorced                                  |               |                |         | 0.810          | (0.498, 1.318) | 0.396   | 0.770             | (0.484, 1.226) | 0.271   |
| Education Level [ref: none/very low (<= 3 years)] |               |                |         |                |                |         |                   |                |         |
| Primary (4-8 years)                               |               |                |         | 0.627          | (0.431, 0.911) | 0.014   | 0.683             | (0.481, 0.969) | 0.033   |
| Secondary school or higher (>8 years)             |               |                |         | 0.430          | (0.247, 0.749) | 0.003   | 0.473             | (0.276, 0.811) | 0.007   |

|                         |       |       |                |       |
|-------------------------|-------|-------|----------------|-------|
| South African           |       | 1.250 | (0.882, 1.773) | 0.210 |
| Working                 |       | 0.916 | (0.629, 1.336) | 0.650 |
| Income Tertile (ref: 1) |       |       |                |       |
| 2                       |       | 1.108 | (0.738, 1.665) | 0.620 |
| 3                       |       | 1.290 | (0.890, 1.869) | 0.179 |
| N                       | 999   | 943   |                | 999   |
| Person Years            | 7,382 | 7,068 |                | 7,382 |

<sup>a</sup> <400 copies/mL.

<sup>b</sup> ≥400 copies/mL.

<sup>c</sup> <1,000 copies/mL.

<sup>d</sup> ≥1,000 copies/mL.

<sup>e</sup> Coefficients and 95% CI are small numbers which appear as 1.000 due to rounding.
