# Supplementary material for: Twin epidemics: the effects of HIV and systolic blood pressure on mortality risk in rural South Africa, 2010-2019
Source: Springer Nature journal article supplement (doi:10.1186/s12889-022-12791-z), 2022-02-24
Supplement: MOESM3 [file 20165916]

**Additional File 3.** Multivariable logistic regression of all-cause mortality for women on baseline characteristics: no covariates, all covariates, and alternate viral load threshold, Agincourt, South Africa, 2010-2019.

| Covariates                                        | No Covariates |                |         | All Covariates |                |         | Alt. VL Threshold |                |         |
|---------------------------------------------------|---------------|----------------|---------|----------------|----------------|---------|-------------------|----------------|---------|
|                                                   | aOR           | 95% CI         | P-value | aOR            | 95% CI         | P-value | aOR               | 95% CI         | P-value |
| Age                                               | 1.064         | (1.053, 1.076) | <0.001  | 1.059          | (1.045, 1.074) | <0.001  | 1.058             | (1.044, 1.071) | <0.001  |
| HIV Status 1 [ref: HIV negative]                  |               |                |         |                |                |         |                   |                |         |
| HIV Positive Suppressed <sup>a</sup>              | 1.409         | (0.819, 2.422) | 0.215   | 1.341          | (0.745, 2.412) | 0.328   |                   |                |         |
| HIV Positive, Unsuppressed <sup>b</sup>           | 2.165         | (1.361, 3.442) | 0.001   | 2.142          | (1.324, 3.466) | 0.002   |                   |                |         |
| HIV Status 2 [ref: HIV negative]                  |               |                |         |                |                |         |                   |                |         |
| HIV Positive Suppressed <sup>c</sup>              |               |                |         |                |                |         | 1.302             | (0.759, 2.232) | 0.337   |
| HIV Positive, Unsuppressed <sup>d</sup>           |               |                |         |                |                |         | 2.221             | (1.361, 3.623) | <0.001  |
| Systolic Blood Pressure                           | 0.960         | (0.916, 1.007) | 0.091   | 0.953          | (0.909, 0.999) | 0.043   | 0.960             | (0.916, 1.006) | 0.088   |
| Systolic Blood Pressure <sup>e</sup>              | 1.000         | (1.000, 1.000) | 0.046   | 1.000          | (1.000, 1.000) | 0.018   | 1.000             | (1.000, 1.000) | 0.043   |
| Blood Pressure Medication                         | 1.317         | (0.968, 1.792) | 0.08    | 1.325          | (0.956, 1.837) | 0.091   | 1.318             | (0.968, 1.796) | 0.080   |
| Marital Status [ref: single]                      |               |                |         |                |                |         |                   |                |         |
| Married/cohabiting                                |               |                |         | 0.631          | (0.347, 1.148) | 0.132   | 0.626             | (0.356, 1.100) | 0.104   |
| Widowed/divorced                                  |               |                |         | 0.917          | (0.527, 1.597) | 0.760   | 0.957             | (0.570, 1.601) | 0.867   |
| Education Level [ref: none/very low (<= 3 years)] |               |                |         |                |                |         |                   |                |         |
| Primary (4-8 years)                               |               |                |         | 0.891          | (0.575, 1.383) | 0.607   | 0.929             | (0.613, 1.408) | 0.730   |
| Secondary school or higher (>8 years)             |               |                |         | 0.839          | (0.466, 1.513) | 0.560   | 0.850             | (0.477, 1.515) | 0.582   |

|                         |        |       |                |        |
|-------------------------|--------|-------|----------------|--------|
| South African           |        | 1.064 | (0.751, 1.508) | 0.725  |
| Working                 |        | 1.153 | (0.763, 1.743) | 0.500  |
| Income Tertile (ref: 1) |        |       |                |        |
| 2                       |        | 0.867 | (0.581, 1.293) | 0.484  |
| 3                       |        | 0.847 | (0.595, 1.206) | 0.356  |
| N                       | 1,759  |       | 1,587          | 1,693  |
| Person Years            | 13,167 |       | 12,509         | 13,166 |

<sup>a</sup> <400 copies/mL.

<sup>b</sup> ≥400 copies/mL.

<sup>c</sup> <1,000 copies/mL.

<sup>d</sup> ≥1,000 copies/mL.

<sup>e</sup> Coefficients and 95% CI are small numbers which appear as 1.000 due to rounding.
